# Supplementary material for: UHPLC Analysis of Reynoutria japonica Houtt. Rhizome Preparations Regarding Stilbene and Anthranoid Composition and Their Antimycobacterial Activity Evaluation
Source: MDPI journal article supplement (doi:10.3390/plants10091809), 2021-08-30
Supplement: s1 [file s1]

# UHPLC Analysis of *Reynoutria japonica* Houtt. Rhizome Preparations Regarding Stilbene and Anthranoid Composition and their Antimycobacterial Activity Evaluation

Fabian Alperth <sup>1</sup>, Lena Melinz <sup>1</sup>, Johannes-Paul Fladerer <sup>1</sup> and Franz Bucar <sup>1,\*</sup>

<sup>1</sup> Institute of Pharmaceutical Sciences, University of Graz, Beethovenstraße 8, 8010 Graz, Austria; fabian.alperth@uni-graz.at; lena.melinz@gmail.com; johannes.fladerer@uni-graz.at

\* Correspondence: franz.bucar@uni-graz.at; Tel.: +43-316-380-5531

## Supplementary Materials

Extract concentrations in mg freeze-dried extract per g solvent were converted to mg/mL under consideration of different densities of ethanolic solutions. Relation of these concentrations to UHPLC sample concentration of 2 mg freeze-dried extract per mL gave multipliers, which were used to adjust quantitative results to represent extract compositions accurately. Data including exact masses of plant materials for extract preparations are given in Table S1.

**Table S1.** Data used for quantitative calculations.

| Sample                                  | Plant Material [g] | Freeze-dried Extract Yield [g] | Solvent [g] / [ml] | Extract concentration [mg/ml] | Multiplicator |
|-----------------------------------------|--------------------|--------------------------------|--------------------|-------------------------------|---------------|
| RM96<br>96% Ethanol<br>ρ = 0.80742 g/ml | 20.0368            | 2.4181                         | 100.47 / 124.43    | 19.433                        | 9.7164        |
| RM70<br>70% Ethanol<br>ρ = 0.88556 g/ml | 20.0547            | 2.113                          | 100.16 / 113.10    | 18.682                        | 9.3410        |
| RM38<br>ρ = 0.95118 g/ml                | 20.0373            | 2.068                          | 100.10 / 105.24    | 19.651                        | 9.8254        |
| RI<br>Water                             | 1.9877             | 0.0772                         | 100.44 / 100.44    | 0.76862                       | 0.3843        |
| RD<br>Water                             | 1.9809             | 0.2403                         | 100.32 / 100.32    | 2.39533                       | 1.1977        |

Correction factors (Tables S2 and S3) were applied according to differences in molecular weight of analytes and reference substances.

**Table S2.** Correction factors for stilbene quantification relative to reference *trans*-resveratrol

| <b>Stilbenes</b>                                     | <b>M [g/mol]</b> | <b>Factor</b> |
|------------------------------------------------------|------------------|---------------|
| <i>trans</i> -Resveratrol ( <b>18</b> ) <sup>1</sup> | 228              | -             |
| <i>trans</i> -Piceatannol-hexoside ( <b>10</b> )     | 406              | 1.781         |
| Resveratrolside ( <b>11</b> )                        | 390              | 1.711         |
| <i>trans</i> -Polydatin ( <b>13</b> )                | 390              | 1.711         |

<sup>1</sup> Reference standard

**Table S3.** Correction factors for anthranoid quantification relative to reference emodin

| <b>Anthranoids</b>                                 | <b>M [g/mol]</b> | <b>Factor</b> |
|----------------------------------------------------|------------------|---------------|
| Emodin ( <b>32</b> ) <sup>1</sup>                  | 270              | -             |
| Emodin-1-O- $\beta$ -glycopyranoside ( <b>19</b> ) | 432              | 1.600         |
| Emodin- hexoside ( <b>23</b> )                     | 432              | 1.600         |
| Emodin-8-O-(6'-O-malonyl)-hexoside ( <b>24</b> )   | 518              | 1.919         |
| Hydroxyemodin ( <b>26</b> )                        | 286              | 1.059         |
| Emodin methyl ether + acetylhexose ( <b>28</b> )   | 488              | 1.807         |
| Emodin methyl ether ( <b>30</b> )                  | 284              | 1.052         |
| Undefined anthranoid ( <b>34</b> )                 | 354              | 1.311         |

<sup>1</sup> Reference standard
